1 **Efficiency of genomic prediction of non-assessed single crosses**

2 José Marcelo Soriano Viana,<sup>\*1</sup> Helcio Duarte Pereira,<sup>1</sup> Gabriel Borges Mundim,<sup>†</sup> Hans-Peter  
3 Piepho,<sup>‡</sup> and Fabyano Fonseca e Silva<sup>§</sup>

4 <sup>\*</sup>Federal University of Viçosa, Department of General Biology, 36570-900, Viçosa, MG, Brazil.

5 <sup>†</sup>Down AgroSciences Seeds and Biotechnology Brazil Ltda, Indianópolis, MG, Brazil.

6 <sup>‡</sup>University of Hohenheim, Institute of Crop Science, Biostatistics Unit, 70599, Stuttgart, Germany.

7 <sup>§</sup>Federal University of Viçosa, Department of Animal Science, 36570-900, Viçosa, MG, Brazil.

8 Reference number for data available in public repository:

9 <https://doi.org/10.6084/m9.figshare.5035130.v1>

10 *REALbreeding* private link: <https://figshare.com/s/618bee7accd410464232>.

11 Running title: Genomic prediction of single crosses.

12 **KEYWORDS** genomic selection; linkage disequilibrium; general combining ability; specific  
13 combining ability; doubled haploids.

14 <sup>1</sup>Corresponding author: José Marcelo Soriano Viana. Federal University of Viçosa, Department of  
15 General Biology, 36570-900, Viçosa, MG, Brazil. E-mail: [jmsviana@ufv.br](mailto:jmsviana@ufv.br). Telephone:  
16 +55(31)3899-2514.

17 **ABSTRACT** The objective was to provide additional relevant information on efficiency of  
18 prediction of non-assessed single crosses. We derived the genetic model for genomic prediction.  
19 The SNP and QTL genotypic data for DH lines, the QTL genotypic data of SCs, and the phenotypic  
20 data for DH lines and SCs were simulated assuming 10,000 SNPs, 400 QTLs, two groups of 70  
21 selected DH lines, and 4,900 SCs. The heritabilities for the assessed SCs were 30, 60 and 100%.  
22 The scenarios included three sampling processes of DH lines, two sampling processes of SCs for  
23 testing, two SNP densities, DH lines from distinct and same populations, DH lines from populations  
24 with lower LD, two genetic models, three statistical models, and three statistical approaches. The  
25 efficiency of prediction of untested SCs was based on the prediction accuracy and the efficacy of  
26 identification of the best 300 (7-9%) non-assessed SCs (coincidence index), computed based on the  
27 true genotypic values. Concerning the prediction accuracy and coincidence, our results proved that  
28 prediction of untested SCs is very efficient. The accuracies and coincidences ranged from  
29 approximately 0.8 and 0.5, respectively, under low heritability, to 0.9 and 0.7, assuming high  
30 heritability. Additionally, we highlighted the relevance of the overall LD and evidenced that  
31 efficient prediction of untested SCs can be achieved for crops that show no heterotic pattern, for  
32 reduced training set size (10%), for SNP density of 1 cM, and for distinct sampling processes of DH  
33 lines, based on random choice of the SCs for testing.

34

## INTRODUCTION

35 Genomic selection is very commonly used in animal breeding programs, especially for dairy  
36 cattle Van Eenennaam et al. (2014). The same cannot yet be said to the same degree concerning  
37 crop breeding. The main reasons for the effective application of genomic selection in livestock  
38 breeding are: it is efficient, that is, the process has high prediction accuracy, the cost of phenotyping  
39 (mainly progeny test) is higher than the cost of genotyping, and the process significantly shortens  
40 the selection cycle (Meuwissen et al. 2013). In spite of the many field and simulation-based studies  
41 with genomic selection in plant breeding, in general the cost of phenotyping is often still much  
42 lower than the cost of genotyping, restricting its application in breeding programs. Jonas and de  
43 Koning (2013) consider that genomic selection has the potential to improve existing plant breeding  
44 schemes. However, based also on the high diversity and complexity of plant breeding methods, they  
45 stated that there are great obstacles to overcome.

46 An important application of genomic selection in plant breeding is the prediction of untested  
47 single crosses (genotypic value prediction) and testcrosses (general combining ability effect  
48 prediction) in hybrid breeding (Zhao et al. 2015). Prediction accuracy of barley two- and three-way  
49 crosses has been investigated (Philipp et al. 2016). The prediction of untested single crosses was  
50 pioneered by Bernardo (1994), based on best linear unbiased prediction (BLUP). Many significant  
51 studies on prediction of untested single cross and testcross performance have been published in the  
52 last 23 years, focused on the assessment of the prediction accuracy. Most investigations were based  
53 on empirical data and estimated the prediction accuracy using a cross-validation procedure. Very  
54 few were based on simulated data (Li et al. 2017; Technow et al. 2012a). With no exception, the  
55 inference was that prediction of untested single crosses and testcrosses can be an efficient,  
56 depending on heritability, training set size, and number of tested inbreds in hybrid combination  
57 (both, one, and none parents tested). Remarkably, this conclusion was drawn from studies differing  
58 in the type of molecular marker, density of markers, number of inbreds, level of relatedness,  
59 diversity, and linkage disequilibrium (LD) between inbreds, heterotic pattern, training set size,

60 genetic model, and statistical approach (Zhao et al. 2015). Efficient prediction of barley two- and  
61 three-way crosses has been achieved when training and validation sets include the same class of  
62 hybrid (Philipp et al. 2016).

63 Most papers on genomic prediction of maize single cross performance published since 2011  
64 have employed single nucleotide polymorphism (SNP), with the number SNPs filtered ranging from  
65 425 (Zhao et al. 2013a) to 39,627 (Technow et al. 2012a). Based on the physical length of the maize  
66 genome (approximately 2,106 megabase pairs (Mb) according to Maize genetics and genomics  
67 database), the SNP density ranged from approximately 5 to 0.05 Mb, respectively. For grain yield,  
68 the relative prediction accuracies (computed as accuracy/root square of the heritability) in these two  
69 papers ranged from 0.27 to 0.62 and from 0.65 to 0.95, respectively. The number of inbreds in each  
70 heterotic group was highly variable too, ranging from six and nine (Bernardo 1994) to 75 and 75  
71 (Technow et al. 2012a). The relative accuracy observed by Bernardo (1994) ranged between 0.72  
72 and 0.89. The number of testcrosses ranged between 255 (Windhausen et al. 2012) and 1,894  
73 (Albrecht et al. 2014). The relative accuracies ranged from 0.46 to 0.52 and from 0.33 to 0.65,  
74 respectively. The level of relatedness ranged from non-related inbreds in each group (Technow et  
75 al. 2012a) to a maximum average value of 0.58 (Bernardo 1995). The relative accuracy obtained by  
76 Bernardo (1995) ranged from 0.41 to 0.80. The common heterotic groups were Stiff Stalk and non-  
77 Stiff Stalk (Kadam et al. 1916) or Dent and Flint (Technow et al. 2014). The study of Bernardo  
78 (1996a) involved nine heterotic groups and the (statistically significant from zero) relative  
79 accuracies ranged from 0.43 to 0.88. No study provided clearly greater prediction accuracy of the  
80 additive-dominance model relative to the additive model. Finally, only with testcrosses the genomic  
81 BLUP (GBLUP) approach outperformed BLUP (Albrecht et al. 2014; Albrecht et al. 2011)  
82 concerning prediction accuracy.

83 Technow et al. (2012a) provided the most comprehensive study on prediction of untested  
84 single cross performance. Our assessment on the efficiency of prediction of non-assessed single

85 crosses provides additional relevant information. Our simulation-based study is the first to provide  
86 for breeders a direct measure of efficiency of identification of the best non-assessed single crosses  
87 (coincidence index), additionally to the standard prediction accuracy. What is the efficiency of  
88 identification of the best 300 untested single crosses if the prediction accuracy is, for example,  
89 approximately 0.90? Our results evidence that the efficacy range between 0.60 and 0.70, depending  
90 on the doubled haploid (DH) lines derivation process. These measures of efficiency were provided  
91 for a large data set (10,000 SNPs, 400 quantitative trait loci (QTLs), 4,900 single crosses) and for  
92 low (30%) to high heritability (100%), assuming scenarios not favorable to prediction of non-  
93 assessed single cross performance, as low level of relatedness and a not high heterotic pattern. Low  
94 heritability has been observed in some CIMMYT's global maize and wheat breeding programs  
95 (Cossa et al. 2014). Additionally, we derived the genetic model for genomic prediction, supported  
96 by quantitative genetics theory, highlighted the relevance of the overall LD (not only for linked  
97 SNPs and QTLs), and evidenced that efficient prediction of untested single crosses can be achieved  
98 for crops that show no clear heterotic pattern, as rice, wheat, and barley, for reduced training set  
99 size (10%), for SNP density of 1 centiMorgan (cM), and for distinct processes of (DH) lines  
100 sampling. Finally, we showed that the choice of the single crosses for testing must be based on a  
101 random process, but never by sampling DH or inbreds lines for a diallel. By sampling 76% of the  
102 available genotyped DH lines in each group for a diallel (Technow et al. (2012a) sampled 75% of  
103 the inbreds), the prediction accuracies and coincidence indexes were 38 to 77% and 39 to 98%  
104 lower, respectively, compared with random sampling of 30% of the possible single crosses for  
105 testing. Thus, our objective was to provide to breeders additional relevant information on prediction  
106 of non-assessed single crosses.

## 107 **MATERIALS AND METHODS**

### 108 **Theory**

109 Generally, most papers on genomic selection presents only statistical aspects and the genetic  
110 models are deduced from gene to SNP effects. Importantly, when there is some quantitative  
111 genetics theory, the LD is completely ignored. The theory developed provides, based on  
112 quantitative genetics including LD, the genetic model for genomic prediction of single crosses. The  
113 model developed offers the genetic background to the models fitted in important previously papers  
114 on prediction of untested single crosses and testcrosses (Massman et al. 2013; Technow et al.  
115 2012a; Albrecht et al. 2011). Notice, however, that the derived model has distinct presuppositions.

### 116 ***LD in a group of selected DH or inbred lines***

117 Consider a group of DH or inbred lines selected from a population or heterotic group. Assume  
118 also a QTL (alleles B/b) and a SNP (alleles C/c) where B and b are the alleles that increase and  
119 decrease the trait expression, respectively. Define the joint genotype probabilities as

120  $P(BBCC) = f_{22}$ ,  $P(BBcc) = f_{20}$ ,  $P(bbCC) = f_{02}$ , and  $P(bbcc) = f_{00}$ , where the subscript

121 indicates the number of copies of the major allele (B and C). The measure of LD between the QTL  
122 and the SNP is  $\Delta_{bc} = f_{22}f_{00} - f_{20}f_{02}$  (Kempthorne 1954) and the haplotype frequencies are

123  $P(BC) = f_{22} = p_b p_c + \Delta_{bc}$ ,  $P(Bc) = f_{20} = p_b q_c - \Delta_{bc}$ ,  $P(bC) = f_{02} = q_b p_c - \Delta_{bc}$ , and

124  $P(bc) = f_{00} = q_b q_c + \Delta_{bc}$ , where  $p$  is the frequency of the major allele (B or C) and  $q = 1 - p$  is

125 the frequency of the minor allele (b or c). Notice that  $p_b = f_{22} + f_{20}$  and  $p_c = f_{22} + f_{02}$ . It is

126 important to highlight the fact that we are not assuming that the QTL and the SNP are linked and in

127 LD in the population or heterotic group, because this is not necessary for genomic prediction. But

128 we are assuming that they are in LD in the group of DH or inbred lines. Furthermore, because

129 selection, genetic drift, and inbreeding (only for inbreds and linked QTLs and SNPs), the gene and

130 genotypic frequencies and the LD values concerning the selected DH or inbred lines cannot be

131 traced to the values in the population or heterotic group.

132 ***SNP genotypic values of DH or inbred lines***

133 The average genotypic value for a group of selected DH or inbred lines is

134  $M_{IL} = m_b + (p_b - q_b)a_b$ , where  $m_b$  is the mean of the genotypic values of the homozygotes and

135  $a_b$  is the deviation between the genotypic value of the homozygote of higher expression and  $m_b$ .

136 Thus, the average SNP genotypic values for the DH or inbred lines CC and cc are

137 
$$G_{CC} = \frac{1}{f_{.2}} \left[ f_{22}(m_b + a_b) + f_{02}(m_b - a_b) \right] = M_{IL} + 2q_c \alpha_{SNP} = M_{IL} + A_{CC}$$

138 
$$G_{cc} = \frac{1}{f_{.0}} \left[ f_{20}(m_b + a_b) + f_{00}(m_b - a_b) \right] = M_{IL} - 2p_c \alpha_{SNP} = M_{IL} + A_{cc}$$

139 where  $\alpha_{SNP} = \left[ \frac{\Delta_{bc}}{p_c q_c} \right] a_b = \kappa_{bc} a_b$  is the average effect of a SNP substitution in the group of DH

140 or inbred lines and A is the SNP additive value for a DH or inbred line. Notice that  $E(A) = 0$ .

141 Assuming two QTLs (alleles B and b, and E and e) in LD with the SNP, the average effect of

142 a SNP substitution in the selected DH or inbred lines is  $\alpha_{SNP} = \kappa_{bc} a_b + \kappa_{ce} a_e$ , where

143  $\kappa_{ce} = \left[ \frac{\Delta_{ce}}{p_c q_c} \right]$ . Thus, in general, the average effect of a SNP substitution (and the SNP additive

144 value) is proportional to the measure of LD and to the a deviation for each QTL that is in LD with

145 the marker.

146 ***SNP genotypic values of single crosses***

147 Aiming to maximize the heterosis, maize breeders commonly assess single crosses originating

148 from selected DH or inbred lines from distinct heterotic groups. Consider  $n_1$  DH or inbred lines

149 from a population or heterotic group and  $n_2$  DH or inbred lines from a distinct population or

150 heterotic group. The average genotypic value for the single crosses derived by crossing the DH or  
 151 inbred lines from group 1 with the DH or inbred lines from group 2 is

$$152 \quad M_H = m_b + \left( p_{b1}p_{b2} - q_{b1}q_{b2} \right) a_b + \left( p_{b1}q_{b2} + q_{b1}p_{b2} \right) d_b$$

153 where  $d_b$  is the dominance deviation (the deviation between the genotypic value of the  
 154 heterozygote and  $m_b$ ).

155 The average genotypic values for the single crosses derived from DH or inbred lines CC and  
 156 cc of the group 1 are

$$157 \quad M_{CC1} = M_H + q_{c1}\kappa_{bc1} \left[ a_b + \left( q_{b2} - p_{b2} \right) d_b \right] = M_H + q_{c1}\kappa_{bc1}\alpha_{b2} = M_H + q_{c1}\alpha_{SNP1}$$

$$= M_H + GCA_{CC1}$$

$$158 \quad M_{cc1} = M_H - p_{c1}\kappa_{bc1}\alpha_{b2} = M_H - p_{c1}\alpha_{SNP1} = M_H + GCA_{cc1}$$

159 where  $\alpha_{b2}$  is the average effect of allelic substitution in the population derived by random crosses

160 between the DH or inbred lines of group 2,  $\alpha_{SNP1}$  is the SNP effect of allelic substitution in the

161 hybrid population relative to a SNP derived from group 1, and GCA stands for the general

162 combining ability effect for a SNP locus. Notice that  $\alpha_{SNP1}$  depends on the LD in group 1

163 ( $\kappa_{bc1} = \Delta_{bc1}/p_{c1}q_{c1}$ ) and the average effect of allelic substitution in the population derived by

164 random crosses between the DH or inbred lines of group 2. Further,

165  $E(GCA) = p_{c1}GCA_{CC1} + q_{c1}GCA_{cc1} = 0$ . Concerning the single crosses derived from DH or

166 inbred lines CC and cc of the group 2 we have

$$167 \quad M_{CC2} = M_H + q_{c2}\kappa_{bc2} \left[ a_b + \left( q_{b1} - p_{b1} \right) d_b \right] = M_H + q_{c2}\kappa_{bc2}\alpha_{b1} = M_H + q_{c2}\alpha_{SNP2}$$

$$= M_H + GCA_{CC2}$$



$$168 \quad M_{cc2} = M_H - p_{c2} \kappa_{bc2} \alpha_{b1} = M_H - p_{c2} \alpha_{SNP2} = M_H + GCA_{cc2}$$

169 Notice that  $E(GCA) = 0$  also. The average genotypic values for the single crosses concerning  
170 the SNP locus are

$$171 \quad M_{CC1 \times CC2} = M_H + q_{c1} \alpha_{SNP1} + q_{c2} \alpha_{SNP2} - 2q_{c1} q_{c2} \kappa_{bc1} \kappa_{bc2} d_b \\ = M_H + GCA_{CC1} + GCA_{CC2} + SCA_{CC1 \times CC2}$$

$$172 \quad M_{cc1 \times cc2} = M_H - p_{c1} \alpha_{SNP1} - p_{c2} \alpha_{SNP2} - 2p_{c1} p_{c2} \kappa_{bc1} \kappa_{bc2} d_b \\ = M_H + GCA_{cc1} + GCA_{cc2} + SCA_{cc1 \times cc2}$$

$$173 \quad M_{CC1 \times cc2} = M_H + q_{c1} \alpha_{SNP1} - p_{c2} \alpha_{SNP2} + 2q_{c1} p_{c2} \kappa_{bc1} \kappa_{bc2} d_b \\ = M_H + GCA_{CC1} + GCA_{cc2} + SCA_{CC1 \times cc2}$$

$$174 \quad M_{cc1 \times CC2} = M_H - p_{c1} \alpha_{SNP1} + q_{c2} \alpha_{SNP2} + 2p_{c1} q_{c2} \kappa_{bc1} \kappa_{bc2} d_b \\ = M_H + GCA_{cc1} + GCA_{CC2} + SCA_{cc1 \times CC2}$$

175 where  $\kappa_{bc1} \kappa_{bc2} d_b = d_{SNP}$  is the SNP dominance deviation in the hybrid population and SCA  
176 stands for the specific combining ability effect for a SNP locus. Notice that  $E(SCA) =$   
177  $p_{c1} p_{c2} SCA_{CC1 \times CC2} + p_{c1} q_{c2} SCA_{CC1 \times cc2} + q_{c1} p_{c2} SCA_{cc1 \times CC2} + q_{c1} q_{c2} SCA_{cc1 \times cc2} = 0$  and  
178 , for each group,  $E(SCA|CC) = E(SCA|cc) = 0$ . That is, the expectation of the SNP SCA effects  
179 given a SNP genotype for the common DH or inbred line is also zero. Notice also that the four  
180 genotypic values depends on four parameters ( $M_H$ ,  $\alpha_{SNP1}$ ,  $\alpha_{SNP2}$ , and  $d_{SNP}$ ).

181 Assuming two QTLs (alleles B and b, and E and e) in LD with the SNP, the SNP dominance  
182 deviation is  $d_{SNP} = \kappa_{bc1} \kappa_{bc2} d_b + \kappa_{ce1} \kappa_{ce2} d_e$ . Thus, generally, the SNP dominance deviation  
183 (and the SNP SCA effect) is proportional to the product of the LD values in both groups of DH or  
184 inbred lines and to the dominance deviation for each QTL that is in LD with the marker.

185 The previous model expressed as a function of the GCA and SCA effects is that proposed by  
 186 Massman et al. (2013), but these authors assumed  $GCA_{CC} + GCA_{cc} = 0$  (for each heterotic group  
 187 and for each SNP) and  $SCA_{CC1 \times CC2} = SCA_{cc1 \times cc2} = -SCA_{CC1 \times cc2} = -SCA_{cc1 \times CC2}$ .  
 188 Technow et al. (2012b) have used a standard extension from QTL to SNP, defining the single cross  
 189 genotypic value for a SNP as a function of the SNP  $a$  and  $d$  deviations. That is,  
 190  $M = M_H + u_1 a_1 + u_2 a_2 + u_3 d$ , where  $u_1$  and  $u_2$  equal to  $1/2$  or  $-1/2$  if the corresponding DH or  
 191 inbred line is homozygous for distinct SNP alleles (CC or cc), and  $u_3$  equal to 0 if the single cross  
 192 is homozygous or 1 if heterozygous.

193 ***SNP genotypic values of single crosses from DH or inbred lines derived from the same***  
 194 ***population or heterotic group***

195 Well defined heterotic groups are known for maize, but not for special maize as popcorn and  
 196 sweet corn and for other crops as wheat (Zhao et al. 2013b), rice (Xu et al. 2014), and barley  
 197 (Philipp et al. 2016). Thus, for many breeders, it is interesting to know about the efficiency of  
 198 genomic prediction of singles crosses when there are no heterotic groups. Assuming  $n$  DH or inbred  
 199 lines derived from the same population or heterotic group, the average genotypic values for the  
 200 single crosses concerning the SNP locus are

$$201 \quad M_{CC \times CC} = M + 2q_c \alpha_{SNP} - 2q_c^2 \kappa_{bc}^2 d_b = M + 2GCA_{CC} + SCA_{CC \times CC}$$

$$202 \quad M_{cc \times cc} = M - 2p_c \alpha_{SNP} - 2p_c^2 \kappa_{bc}^2 d_b = M + 2GCA_{cc} + SCA_{cc \times cc}$$

$$203 \quad M_{CC \times cc} = M + 2(q_c - p_c) \alpha_{SNP} + 2p_c q_c \kappa_{bc}^2 d_b = M + GCA_{CC} + GCA_{cc} + SCA_{CC \times cc}$$

204 where  $M = m_b + (p_c - q_c) a_b + 2p_c q_c d_b$  is the hybrid population mean,

205  $\alpha_{SNP} = \kappa_{bc} [a_b + (q_b - p_b) d_b] = \kappa_{bc} \alpha_b$  is the average effect of a SNP substitution in the hybrid

206 population, and  $d_{SNP} = \kappa_{bc}^2 d_b$  is the SNP dominance deviation. Notice that the SNP GCA effects

207 are equal to half the SNP additive value for the single crosses (A), the SNP SCA effects are the SNP  
 208 dominance deviations for the single crosses (D), and that the three genotypic values depends on  
 209 three parameters ( $M$ ,  $\alpha_{\text{SNP}}$ , and  $d_{\text{SNP}}$ ). Notice also that  $E(\text{GCA}) = E(\text{A}) = E(\text{SCA}) =$   
 210  $E(\text{SCA}|\text{CC}) = E(\text{SCA}|\text{cc}) = E(\text{D}) = 0$ .

### 211 *Accuracy of single cross genomic prediction*

212 Assuming a QTL and a SNP in LD in the two groups of DH or inbred lines, the predictor of  
 213 the single cross QTL genotypic value is the single cross SNP genotypic value (because they are  
 214 proportional). Thus, the covariance between the predictor and the genotypic value is

$$\begin{aligned}
 \text{Cov}(\tilde{G}, G) &= f_{22}^1 f_{22}^2 \left[ M_H + \text{GCA}_{\text{CC1}} + \text{GCA}_{\text{CC2}} + \text{SCA}_{\text{CC1xCC2}} \right] \left[ M_H + \text{GCA}_{\text{BB1}} + \text{GCA}_{\text{BB2}} + \text{SCA}_{\text{BB1xBB2}} \right] + \\
 &+ f_{22}^1 f_{20}^2 \left[ M_H + \text{GCA}_{\text{CC1}} + \text{GCA}_{\text{cc2}} + \text{SCA}_{\text{CC1xcc2}} \right] \left[ M_H + \text{GCA}_{\text{BB1}} + \text{GCA}_{\text{BB2}} + \text{SCA}_{\text{BB1xBB2}} \right] + \\
 &\dots \\
 215 &+ f_{00}^1 f_{00}^2 \left[ M_H + \text{GCA}_{\text{cc1}} + \text{GCA}_{\text{cc2}} + \text{SCA}_{\text{cc1xcc2}} \right] \left[ M_H + \text{GCA}_{\text{bb1}} + \text{GCA}_{\text{bb2}} + \text{SCA}_{\text{bb1xbb2}} \right] - (M_H)^2 \\
 &= p_{c1} q_{c1} \left( \kappa_{bc1} \alpha_{b2} \right)^2 + p_{c2} q_{c2} \left( \kappa_{bc2} \alpha_{b1} \right)^2 + 4 p_{c1} q_{c1} p_{c2} q_{c2} \left( \kappa_{bc1} \kappa_{bc2} d_b \right)^2 \\
 &= p_{c1} q_{c1} \left( \alpha_{\text{SNP1}} \right)^2 + p_{c2} q_{c2} \left( \alpha_{\text{SNP2}} \right)^2 + 4 p_{c1} q_{c1} p_{c2} q_{c2} \left( d_{\text{SNP}} \right)^2 \\
 &= \sigma_{\text{GCA}_{\text{SNP}}}^{2(1)} + \sigma_{\text{GCA}_{\text{SNP}}}^{2(2)} + \sigma_{\text{SCA}_{\text{SNP}}}^2 = \sigma_{\text{G}(\text{SNP})}^2
 \end{aligned}$$

216 where the GCA and SCA effects for the QTL are  $\text{GCA}_{\text{BB1}} = q_{b1} \alpha_{b2}$ ,  $\text{GCA}_{\text{bb1}} = -p_{b1} \alpha_{b2}$ ,

218  $\text{GCA}_{\text{BB2}} = q_{b2} \alpha_{b1}$ ,  $\text{GCA}_{\text{bb2}} = -p_{b2} \alpha_{b1}$ ,  $\text{SCA}_{\text{BB1xBB2}} = -2q_{b1}q_{b2}d_b$ ,

219  $\text{SCA}_{\text{BB1xbb2}} = 2q_{b1}p_{b2}d_b$ ,  $\text{SCA}_{\text{bb1xBB2}} = 2p_{b1}q_{b2}d_b$ , and  $\text{SCA}_{\text{bb1xbb2}} = -2p_{b1}p_{b2}d_b$ ,

220  $\sigma_{\text{GCA}}^2$  and  $\sigma_{\text{SCA}}^2$  are the GCA and SCA variances for the SNP locus, and  $\sigma_{\text{G}}^2$  is the SNP

221 genotypic variance. The GCA and SCA variances for the QTL are  $\sigma_{\text{GCA}}^{2(1)} = p_{b1}q_{b1} \left( \alpha_{b2} \right)^2$ ,

222  $\sigma_{GCA}^{2(2)} = p_{b2}q_{b2}(\alpha_{b1})^2$ , and  $\sigma_{SCA}^2 = 4p_{b1}q_{b1}p_{b2}q_{b2}(d_b)^2$ . The QTL genotypic variance is

223  $\sigma_G^2 = \sigma_{GCA}^{2(1)} + \sigma_{GCA}^{2(2)} + \sigma_{SCA}^2$  Thus, the single cross prediction accuracy is

224 
$$\rho_{\tilde{G}, G} = \sqrt{\frac{\sigma_{G(SNP)}^2}{\sigma_G^2}}$$

225 Assuming  $s$  SNPs,

226 
$$\rho_{\tilde{G}, G} = \sum_{r=1}^s \sigma_{G(SNP(r))}^2 / \sqrt{\sigma_{\tilde{G}}^2 \sigma_G^2}$$

227 where  $\sigma_{\tilde{G}}^2$  is the variance of the predicted single cross genotypic values and  $\sigma_G^2$  is the single cross

228 genotypic variance. Further,

229 
$$\alpha_{SNP(r)1} = \sum_{i=1}^{k'} \left[ \frac{\Delta_{ri1}}{p_{r1}q_{r1}} \right] \alpha_{i2} = \sum_{i=1}^{k'} \kappa_{ri1} \alpha_{i2}$$
, where  $k'$  is the number of QTLs in LD with the SNP

230  $r$ ) in group 1, and

231 
$$d_{SNP(r)} = \sum_{i=1}^{k''} \left[ \frac{\Delta_{ri1}}{p_{r1}q_{r1}} \right] \left[ \frac{\Delta_{ri2}}{p_{r2}q_{r2}} \right] d_i = \sum_{i=1}^{k''} \kappa_{ri1} \kappa_{ri2} d_i$$
 where  $k''$  is the number of QTLs in LD with

232 the SNP  $r$  in both groups

233 Notice that because the accuracy of genomic prediction of single crosses depends on the  
 234 squares of the average effects of SNP substitution and the SNP dominance deviations, it is not  
 235 affected by the linkage phase (coupling or repulsion), as it does not depend on linkage. But it  
 236 depends on the magnitude of the LD in each group of DH or inbred lines.

237 Assuming single crosses derived from DH or inbred lines of a single population or heterotic  
 238 group we have  $\sigma_{G(\text{SNP})}^2 = 2p_cq_c(\alpha_{\text{SNP}})^2 + (2p_cq_c d_{\text{SNP}})^2$  and  
 239  $\sigma_G^2 = 2p_bq_b(\alpha_b)^2 + (2p_bq_b d_b)^2$ .

#### 240 **The statistical model for single cross genomic prediction**

241 Assume  $n_1$  and  $n_2$  (several tens) DH or inbred lines from two populations or heterotic groups  
 242 genotyped for  $s$  (thousands) SNPs and the experimental assessment of  $h$  (few hundred) single-  
 243 crosses ( $h$  much lower than  $n_1 \cdot n_2$ ) in  $e$  (several) environments (a combination of growing seasons,  
 244 years, and locals). Defining  $y$  as the adjusted single cross phenotypic mean, the statistical model  
 245 for prediction of the average effects of SNP substitution and the SNP dominance deviations is

$$246 \quad y = M_H + \sum_{r=1}^s \left( z_{1_r} \alpha_{\text{SNP}1_r} + z_{2_r} \alpha_{\text{SNP}2_r} + z_{3_r} d_{\text{SNP}_r} \right) + \text{error}$$

247 where  $z_{1_r} = q_{r1}$ ,  $z_{2_r} = q_{r2}$ , and  $z_{3_r} = -2q_{r1}q_{r2}$  if the SNP genotypes for the DH or inbred lines  
 248 are CC (group 1) and CC (group 2),  $z_{1_r} = -p_{r1}$ ,  $z_{2_r} = -p_{r2}$ , and  $z_{3_r} = -2p_{r1}p_{r2}$  if the SNP  
 249 genotypes for the DH or inbred lines are cc (group 1) and cc (group 2),  $z_{1_r} = q_{r1}$ ,  $z_{2_r} = -p_{r2}$ , and  
 250  $z_{3_r} = 2q_{r1}p_{r2}$  if the SNP genotypes for the DH or inbred lines are CC (group 1) and cc (group 2),  
 251 and  $z_{1_r} = -p_{r1}$ ,  $z_{2_r} = q_{r2}$ , and  $z_{3_r} = p_{r1}q_{r2}$  if the SNP genotypes for the DH or inbred lines are  
 252 cc (group 1) and CC (group 2).

253 Regarding the single crosses obtained from DH or inbred lines of the same population or  
 254 heterotic group we have

$$255 \quad y = M + \sum_{r=1}^s \left( z_{1_r} \alpha_{\text{SNP}_r} + z_{2_r} d_{\text{SNP}_r} \right) + \text{error}$$

256 where  $z_{1_r} = 2q_r$  and  $z_{2_r} = -2q_r^2$  if the SNP genotypes for the DH or inbred lines are CC and CC,

257  $z_{1_r} = -2p_r$  and  $z_{2_r} = -2p_r^2$  if the SNP genotypes for the DH or inbred lines are cc and cc, and

258  $z_{1_r} = 2(q_r - p_r)$  and  $z_{2_r} = 2p_rq_r$  if the SNP genotypes for the DH or inbred lines are CC and cc.

259 The statistical problem of genomic prediction when there are a very large number of  
260 molecular markers and relatively few observations have been addressed thorough several  
261 regularized whole-genome regression and prediction methods (Daetwyler et al. 2013; de Los  
262 Campos et al. 2013). Then, the predicted effects of SNP substitution ( $\tilde{\alpha}$ ) and SNP dominance  
263 deviations ( $\tilde{d}$ ) must be used to provide genomic prediction of non-assessed single crosses. The  
264 predicted genotypic value for a non-assessed single cross of DH or inbred lines from two groups is

$$265 \quad \tilde{G} = \hat{M}_H + \sum_{r=1}^s \left( z_{1_r} \tilde{\alpha}_{\text{SNP}_{1_r}} + z_{2_r} \tilde{\alpha}_{\text{SNP}_{2_r}} + z_{3_r} \tilde{d}_{\text{SNP}_{r}} \right)$$

266 For a non-assessed single cross of DH or inbred lines from the same group, the predicted  
267 genotypic value is

$$268 \quad \tilde{G} = \hat{M} + \sum_{r=1}^s \left( z_{1_r} \tilde{\alpha}_{\text{SNP}_{r}} + z_{2_r} \tilde{d}_{\text{SNP}_{r}} \right)$$

## 269 **Simulation**

270 The SNP and QTL genotypic data for DH lines, the QTL genotypic data of single crosses, and  
271 the phenotypic data for DH lines and single crosses were simulated using the software  
272 *REALbreeding*. The program has been developed by the first author using the software *REALbasic*  
273 *2009* (Viana et al. 2017a; Viana et al. 2017b; Viana et al. 2016; Azevedo et al. 2015; Viana et al.  
274 2013). Based on our input, the software distributed 10,000 SNPs and 400 QTLs in ten  
275 chromosomes (1,000 SNPs and 40 QTLs by chromosome). The average SNP density was 0.1 cM.  
276 The QTLs were distributed in the regions covered by the SNPs (approximately 100  
277 cM/chromosome). Initially, *REALbreeding* sampled 700 DH lines from two non-inbred populations

278 (heterotic groups) in LD (350 from each population). The populations were composites of two  
279 populations in linkage equilibrium. In a composite, there is LD only for linked SNPs and QTLs  
280 (Viana et al. 2016). The number of DH lines from each  $S_0$  plant was one (scenario 1) or ranged  
281 from 1 to 5 (scenario 2). We also sampled 350 DH lines from each population after three  
282 generations of selfing (using the single seed descent process). The number of DH lines from each  $S_3$   
283 plant ranged from 1 to 5 (scenario 3). For each scenario, the software then crossed 70 selected DH  
284 lines from each population, using a diallel design. The heritability for the DH lines was 30%.

285         The genotypic values of the DH lines and of the single crosses were generated assuming a  
286 single set of 400 QTLs and two degrees of dominance. To simulate grain yield and expansion  
287 volume, a measure of popcorn quality, we defined positive dominance ( $0 < (d/a)_i \leq 1.2$ ,  $i = 1, \dots,$   
288 400) and bidirectional dominance ( $-1.2 \leq (d/a)_i \leq 1.2$ ), respectively, where  $d/a$  is the degree of  
289 dominance. To compute the genotypic values, *REALbreeding* used our input relative to the  
290 maximum and minimum genotypic values for homozygotes. For grain yield and expansion volume,  
291 we defined 140 and 30 g/plant and 55 and 15 mL/g, respectively. The phenotypic values were  
292 obtained from the sum of the population mean, genotypic value, and experimental error. The error  
293 variance was computed from the broad sense heritability. To avoid outliers, we defined the  
294 maximum and minimum phenotypic values as 160 and 10 g/plant and 65 and 5 mL/g.

295         The heritabilities for the assessed single crosses were 30, 60, and 100%. Thus, the genotypic  
296 value prediction accuracies of the assessed single crosses were 0.55, 0.77, and 1.00, respectively.  
297 For each scenario were processed 50 resamplings of 30 and 10% of the single crosses (1,470 and  
298 490 assessed single crosses). That is, we predicted 70 and 90% of the single crosses (3,430 and  
299 4,410 non-assessed single crosses). Additionally, to assess the relevance of the number of DH lines  
300 sampled, we fixed the number of DH lines to achieve the same number of assessed single crosses,  
301 using a diallel. That is, we sampled 50 times 38 and 22 DH lines in each group for a diallel  
302 (scenario 4), generating 1,444 and 484 single crosses for assessment, respectively. We called these

303 processes as sampling of single crosses (scenarios 1 to 3) and sampling of DH lines (scenario 4).  
304 Other additional scenarios were: genomic prediction of single crosses from selected DH lines from  
305 same heterotic group (interestingly for wheat, rice, and barley breeders, for example) (scenario 5)  
306 and from selected DH lines from populations with lower LD (scenario 6), to emphasize that the  
307 prediction accuracy depends on the LD in the groups of DH or inbred lines. A last scenario  
308 (seventh) was genomic prediction of single crosses under an average density of one SNP each cM.  
309 This lower density was obtained by random sampling of 100 SNPs per chromosome using a  
310 *REALbreeding* tool (*sampler*). To investigate the single cross prediction efficiency based on our  
311 model and on the models proposed by Massman et al. (2013) and Technow et al. (2012b), we used  
312 another *REALbreeding* tool (*Incidence matrix*) to generate the incidence matrices for the three  
313 models and for the two DH lines sampling processes. To assess the relevance of the SCA effects  
314 prediction on genomic prediction of single cross performance, we also fitted the additive model  
315 (including only the GCA effects). For comparison purpose, we also processed single cross  
316 prediction based on GBLUP (with the observed additive and dominance relationship matrices) and  
317 BLUP (with the expected additive and dominance relationship matrices).

### 318 **Statistical analysis**

319 The methods used for prediction were ridge regression BLUP (RR-BLUP), GBLUP and  
320 BLUP. For the analyses we used the *rrBLUP* package (Endelman 2011). The accuracies of single  
321 cross genotypic value prediction were obtained by the correlation between the true values of the  
322 non-assessed single crosses computed by *REALbreeding* and the values predicted by RR-BLUP,  
323 GBLUP, and BLUP. We also computed the efficiency of identification of the 300 non-assessed  
324 single crosses of higher genotypic value (coincidence index). The parametric average coincidence  
325 index was computed by ordering the average phenotypic values of the 4,900 single crosses for each  
326 heritability and for each DH lines derivation process. Regarding grain yield, for heritability of 30%  
327 the coincidence index was 0.2533, 0.2833, and 0.2433 assuming one DH line per  $S_0$  plant, one to



328 five DH lines per  $S_0$  plant, and one to five DH lines per  $S_3$  plant, respectively. The corresponding  
329 values for heritability of 60% were, respectively, 0.4800, 0.4900, and 0.4567. Concerning  
330 expansion volume, the corresponding values for heritabilities of 30 and 60% were, respectively,  
331 0.2600, 0.2833, and 0.2700, and 0.4733, 0.5100, and 0.4533. The assumed average parametric  
332 coefficient index was 0.26 and 0.48 for heritabilities of 30 and 60%, respectively, for both traits.  
333 For the population structure analysis we employed *Structure* (Falush et al. 2003) and fitted the no  
334 admixture model with independent allelic frequencies. The number of SNPs, sample size, burn-in  
335 period, and number of MCMC (Markov chain Monte Carlo) replications were 1,000 (sampled at  
336 random), 140 (70 DH lines from each population), 10,000, and 40,000, respectively. The number of  
337 populations assumed ( $K$ ) ranged from 1 to 4, and the most probable  $K$  value was determined based  
338 on the inferred plateau method (Viana et al. 2013). The LD analyses were performed with  
339 *Haploview* (Barrett et al. 2005).

#### 340 **Data availability**

341 *REALbreeding* is available upon request. The data set is available at  
342 <https://doi.org/10.6084/m9.figshare.5035130.v1>. Data citation:

343 Viana, José Marcelo Soriano; Pereira, Helcio Duarte; Mundim, Gabriel Borges; Piepho, Hans-Peter;  
344 Fonseca e Silva, Fabyano (2017): Efficiency of genomic prediction of non-assessed single crosses.  
345 figshare. <https://doi.org/10.6084/m9.figshare.5035130.v1>

#### 346 **RESULTS**

347 The parametric mean and genotypic variance in the populations 1 and 2 were 108.5 and 87.3  
348 (g/plant) and 4.7680 and 6.2580 (g/plant)<sup>2</sup>. The DH lines derivation processes (one and one to five  
349 per  $S_0$  plant and one to five per  $S_3$  plant) provided, for each population, selected DH lines with  
350 similar mean (approximately 97 and 76 g/plant for populations 1 and 2), inbreeding depression  
351 (approximately -10 and -13% for populations 1 and 2), and genotypic variance (approximately 6  
352 and 7 (g/plant)<sup>2</sup> for populations 1 and 2) and groups of single crosses also similar for mean

353 (approximately 103 g/plant), heterosis (approximately 19%), and genotypic variance  
354 (approximately 4 (g/plant)<sup>2</sup>). Because we derived one to few DH lines from unrelated S<sub>0</sub> and S<sub>3</sub>  
355 plants, the average level of relatedness between the selected DH lines was very low (zero and zero,  
356 0.0041 and 0.0041, and 0.0054 and 0.0074 assuming one DH line per S<sub>0</sub>, one to five DH lines per  
357 S<sub>0</sub>, and one to five DH lines per S<sub>3</sub>, for populations 1 and 2, respectively). Concerning SNP data,  
358 the frequency distribution of the minor allele frequency (MAF) and the absolute value of the  
359 difference between a SNP allele frequency were also similar for both groups of selected DH lines,  
360 regardless of the DH line derivation process (Figure 1a, b, c). The average MAF was 0.33,  
361 regardless of the population and DH line derivation process. However, the evidence obtained by the  
362 population structure analysis was that the DH lines belong to two distinct subpopulations (suggested  
363 *K* equal to 2.4 by the inferred plateau method). The percentages of non-polymorphic SNPs were  
364 very low (0.1 to 0.4%). No differences between allelic frequencies were observed for only 1.7 to  
365 2.1% of the SNPs. For approximately 70% of the SNPs, the absolute difference between allelic  
366 frequencies ranged from 0.1 to 0.6. Regarding LD, for the groups of selected DH lines the evidence  
367 based on the analysis of chromosome 1 (no difference between chromosomes is expected) is that  
368 LD extents for up to 35 cM, regardless of the DH lines derivation process (Figure 1c, d). Ignoring  
369 the non-significant LD values (LOD score lower than 3), for 17 to 20% of the SNP pairs the *r*<sup>2</sup>  
370 values ranged from 0.2 to 0.5 (average of 0.16, regardless of the DH lines group and derivation  
371 process).

372 Assuming our model, average SNP density of 0.1 cM, training set size of 30%, positive  
373 dominance (grain yield), additive-dominance model, and sampling of single crosses, the prediction  
374 accuracies of the non-assessed single crosses were greater than the accuracies of the assessed single  
375 crosses for low (up to 46% higher) and intermediate (up to 16% higher) heritabilities (Table 1;  
376 Figure 2a). As the prediction accuracy of assessed single crosses approaches 1.0, the accuracy of the  
377 non-assessed single crosses approaches approximately 0.9 (up to 11% lower). Sampling one to five

378 DH lines per  $S_3$  plant was only slightly superior to the other DH lines derivation processes,  
379 regardless of the prediction accuracy of the assessed single crosses (up to 5% higher). Fitting the  
380 additive model provided essentially the same prediction accuracies since the maximum decrease  
381 was approximately 1%. No significant differences between the prediction accuracies of non-  
382 assessed single crosses were also observed assuming bidirectional dominance (expansion volume).  
383 The differences compared to positive dominance ranged from approximately -5 to 2%. However, a  
384 striking difference was observed between the sampling processes of single crosses for testing.  
385 Random sampling of single crosses provided much greater prediction accuracies of non-assessed  
386 single crosses, compared to sampling DH lines for a diallel. The increases in the accuracies by  
387 sampling single crosses ranged from approximately 38 to 77%, proportional to the heritability.  
388 Decreasing the average SNP density to 1 cM led to a slight decrease in the prediction accuracy of  
389 non-assessed single crosses of approximately -4%). Decreasing the training set size to 10%  
390 decreased the prediction accuracy of non-assessed single crosses in approximately -5 to -15%,  
391 inversely proportional to the heritability. To evidence that the prediction accuracy of non-assessed  
392 single crosses depends on the level of (overall) LD in the groups of selected DH or inbred lines, we  
393 derived DH lines from the same base populations after 10 generations of random crosses (to  
394 decrease the LD). The accuracies were also high, ranging from 0.83 to 0.95, proportional to the  
395 heritability. The prediction accuracies of non-assessed single crosses from DH lines of the same  
396 population were equivalent to the accuracies for single crosses derived from DH lines belonging to  
397 distinct heterotic groups, ranging from 0.83 to 0.91, also proportional to the heritability. Comparing  
398 our statistical model with the models proposed by Massman et al. (2013) and Technow et al.  
399 (2012a), we observed no differences for the prediction accuracies of non-assessed single crosses  
400 (maximum difference of 1%). Finally, no significant differences between the prediction accuracies  
401 for RR-BLUP, GBLUP, and BLUP occurred (maximum of 2%), excepting for one to five DH lines  
402 per  $S_3$  plant, where BLUP was 9 to 10% inferior, regardless of the heritability.

403 Concerning the coincidence index, in general the inferences are the same established from the  
404 prediction accuracy analysis (Table 2; Figure 2b). There were no differences between the  
405 coincidence indexes regarding our model and the models proposed by Massman et al. (2013) and  
406 Technow et al. (2012a) (maximum difference of 3%), and between the RR-BLUP, GBLUP, and  
407 BLUP approaches, except for one to five DH lines per  $S_3$  plant, where BLUP was -19 to -27%  
408 inferior, proportional to the heritability. The coincidence indexes were also high for single crosses  
409 derived from selected DH lines obtained from the base populations with lower LD (ranging from  
410 0.55 to 0.76, proportional to the heritability) and from selected DH lines of the same population  
411 (ranging from 0.61 to 0.76, also proportional to the heritability). Sampling single crosses for  
412 assessment also provided much greater coincidence index compared to sampling DH lines for a  
413 diallel (39 to 98% higher, proportional to the heritability). Decreasing the SNP density and the  
414 training set size decreased the coincidence index from 5 to 10% (proportional to the heritability)  
415 and from 17 to 26% (inversely proportional to the heritability), respectively. The maximum  
416 difference in the coincidence index by fitting the additive-dominant and the additive models was  
417 -3%. Only for one DH line per  $S_0$  plant the coincidence indexes assuming bidirectional dominance  
418 were slightly greater than the values assuming positive dominance (9 to 14% greater). This  
419 sampling process of DH lines provided the higher values of coincidence index, compared to the  
420 other sampling processes (7 to 26% higher, inversely proportional to the heritability). Finally, the  
421 coincidence index of the non-assessed single crosses are greater than the parametric values for all  
422 assessed single crosses assuming low (up to 117% higher) and intermediate (up to 39% higher)  
423 heritabilities (Table 1). However, as the parametric coincidence of assessed single crosses  
424 approaches 1.0, the coincidence values of the non-assessed single crosses approach approximately  
425 0.60 to 0.74 (up to 26 to 40% lower), depending on the DH line sampling process.

426

## DISCUSSION

427           It was twenty-three years ago today, Bernardo (1994) taught the breeders to use BLUP (more  
428 precisely, GBLUP) for predicting untested maize single cross performance. BLUP, as well known,  
429 is the Henderson's (1974) approach for genetic assessment. Based on the prediction accuracies  
430 obtained by Bernardo (1994, 1995, 1996a, 1996b, 1996c), for grain yield and other traits (distinct  
431 genetic controls), a breeder should realize that the performance of untested single crosses can be  
432 effectively predicted using relationship information from molecular or pedigree data, unbalanced  
433 and large data set, and diverse heterotic patterns. This general inference has been confirmed with  
434 maize (Zhao et al. 2015) and other important crops, as rice (Xu et al. 2014), wheat (Zhao et al.  
435 2013b) and barley (Philipp et al. 2016), along the last 20 years. Why, then, there is no published  
436 evidence that prediction of untested single crosses is of general use by breeders of worldwide seed  
437 companies? What should be additionally proved to make prediction of untested single crosses as  
438 successful as the Jenkins' (1934) method for predicting double crosses performance was? We  
439 believe that this paper offers a significant contribution.

440           Our assessment on efficiency of prediction of untested single cross performance keeps some  
441 similarities with few earlier studies but sharp differences for most previous investigations. This  
442 study is based on simulated data set, as the study of Technow et al. (2012a), assuming 400 QTLs  
443 distributed along ten chromosomes. Thus, the prediction accuracies and coincidence indexes (a  
444 measure of untested single crosses selection efficiency) are for really non-assessed single crosses  
445 since the values were computed based on the true genotypic values of the non-assessed single  
446 crosses and not on a cross-validation procedure involving assessed single crosses. This does not  
447 mean that we consider simulated data better than field data or have any criticism on the cross-  
448 validation procedure. We know that simulated data, because the presuppositions, cannot integrally  
449 describe the complexity of populations and genetic determination of traits (Daetwyler et al. 2013).  
450 To highlight the relevance of (overall) LD, our study is based on scenarios not favorable to  
451 prediction of untested single cross performance: very low level of relationship between the DH

452 lines, low and intermediate heritabilities for the assessed single crosses, and not higher heterotic  
453 pattern. In the studies of Massman et al. (2013) and Bernardo (1994, 1995, 1996a) the relationship  
454 among inbreds from the same heterotic group ranged from 0.11 to 0.58. Riedelsheimer et al. (2012)  
455 observed high relationship only between the non-Stiff Stalk inbreds. Technow et al. (2012a)  
456 assumed non-related inbreds. For most of the investigations on prediction of untested single crosses  
457 and testcrosses, the grain yield heritability ranged from 0.72 to 0.88. The common heterotic patterns  
458 in these previous studies are Stiff Stalk and non-Stiff Stalk, and Dent and Flint. The MAF in the  
459 groups of Dent and Flint inbreds were approximately 0.10 and 0.20, respectively, and  
460 approximately 20% of the SNPs showed a difference of allelic frequency of at least 0.6.

461       Concerning the prediction accuracy and the efficiency of identification of the superior 300  
462 non-assessed single crosses, our results prove that prediction of untested single crosses is a very  
463 efficient procedure (note that we are not saying genomic prediction), specially for low and  
464 intermediate heritabilities of the assessed single crosses. The prediction accuracy of the non-  
465 assessed single crosses under low (0.55 to 0.71) and intermediate (0.74 to 0.87) accuracies of  
466 assessed single crosses achieved 0.85 and 0.89, respectively. It is important to highlight that these  
467 are not relative accuracies. Most important, the coincidence of the non-assessed single crosses  
468 under low (0.26 to 0.39) and intermediate (0.44 to 0.66) parametric coincidences of assessed single  
469 crosses achieved 0.59 and 0.64, respectively. For high heritability (80 to 95%; accuracies from 0.89  
470 to 0.97), as observed in most of the studies on prediction of untested single cross performance, we  
471 can state (based on values predicted by fitting a quadratic regression model) that the prediction  
472 accuracy of non-assessed single crosses is up to only 10% lower (0.87 to 0.92) and, most  
473 impressive, the coincidence index can range from 0.61 to 0.71 (parametric coincidences between  
474 0.72 to 0.93). Under maximum accuracy of assessed single crosses (1.0), the prediction accuracy  
475 and coincidence of non-assessed single crosses achieved 0.93 and 0.76. Thus, assuming high  
476 heritability, high density, and training set size of 30%, the accuracy can achieve 0.92 and the

477 efficiency of identification of the best 9% of the non-assessed single crosses can achieve 0.71. It is  
478 important to highlight that this efficacy can be higher by using more related DH or inbred lines,  
479 under high LD. Thus, we strong recommend that maize breeders, as well as rice, wheat, and barley  
480 breeders, make widespread use of prediction of non-assessed single crosses, at least for preliminary  
481 screening or prior to field testing.

482 To take advantage of genomic prediction, Kadam et al. (2016) recommend redesigning hybrid  
483 breeding programs. However, because breeders are unlikely to rely solely on genomic predictions  
484 when selecting superior untested hybrids, Technow et al. (2014) believe that genomic prediction  
485 will be combined with field testing of the most promising experimental hybrids. For grain yield, the  
486 prediction accuracies observed by Bernardo (1994, 1995, 1996a) ranged from 0.14 to 0.80,  
487 proportional to the heritability (in the range 35-74%) and training set size. The non-relative  
488 accuracies (relative accuracy x root square of heritability) observed in the studies of Kadam et al.  
489 (2016), Technow et al. (2014), Massman et al. (2013), Technow et al. (2012a), and Riedelsheimer et  
490 al. (2012) ranged between 0.20 and 0.86, also proportional to the heritability (in the range 53-98%)  
491 and training set size.

492 We hope that readers of this paper have realized the importance of (overall) LD for effective  
493 prediction of non-assessed single crosses, as well as genetic variability (see the parametric accuracy  
494 of genomic prediction). Breeders have no control over LD and relatedness between the DH or  
495 inbred lines. However, selection should always provide high level of overall LD in the groups of  
496 selected DH or inbred lines. Comparison of our LD assessment with the LD analyses from other  
497 studies is inadequate because we have distances in cM and not in base-pairs. But in general the level  
498 of LD was high ( $r^2$  of approximately 0.3) only for SNPs separated by up to 0.5 Mb (Technow et al.  
499 2014; Massman et al. 2013; Technow et al. 2012a; Riedelsheimer et al. 2012). To maximize the  
500 prediction accuracy and the efficiency of identification of the best non-assessed single crosses it is  
501 necessary to adopt the random sampling of single crosses for testing instead of the random sampling

502 of DH or inbred lines for a diallel. This is because sampling 30 or even 10% of the single crosses  
503 leads to single crosses for testing derived from all DH or inbred lines from each group. In our case,  
504 in every resampling assuming training set size of 30 and 10% we always get groups of assessed  
505 single crosses (1,470 and 490 single crosses, respectively) derived from the 70 DH lines of each  
506 group. However, sampling DH lines for a diallel provided 1,440 and 484 single crosses for testing  
507 derived from 38 and 22 DH lines, respectively. Thus, the sampling of single crosses provides best  
508 prediction of the SNP average effects of substitution. Riedelsheimer et al. (2012) emphasized the  
509 need for large genetic variability to obtain high prediction accuracies. Further, their results indicated  
510 that pairs of closely related lines and population structuring only weakly contributed to the high  
511 prediction accuracies. Regarding dominance, because it can be a relevant genetic effect, breeders  
512 should always fit the additive-dominance model to maximize the prediction accuracy and the  
513 efficiency of identification of the best non-assessed single crosses. Interestingly, in most of the  
514 studies on prediction of non-assessed single crosses the prediction accuracy did not significantly  
515 increase when modeling SCA in addition to GCA effects (Zhao et al. 2015).

516         Concerning SNP density and training set size, factors related with the costs of genotyping and  
517 phenotyping, breeders should find a balance between efficiency and expenses, since maximizing  
518 SNP density and training set size maximizes the efficiency of untested single cross prediction.  
519 Based on our results, because the decreases in the prediction accuracy (approximately 4%) and  
520 coincidence index (5 to 10%) by decreasing the average SNP density from 0.1 to 1 cM are of  
521 reduced magnitude, we consider sufficient to employ custom genotyping to provide an average SNP  
522 density of 1 cM. Decreasing the training set size from 30 to 10% of the single crosses does not  
523 significantly affect the prediction accuracy under intermediate to high heritability (decrease of up to  
524 9%), but the coincidence index can be reduced in up to 21%. However, considering that the  
525 coincidence index will be kept in the range 0.48 to 0.61, proportional to the heritability, and that the  
526 maximum values are in the range 0.48 to 0.61, we also consider sufficient to assess at least 10% of



527 the possible single crosses. As highlighted by Zhao et al. (2015), marker density only marginally  
528 affects the prediction accuracy of untested single crosses. For biparental populations, a plateau for  
529 the accuracy is reached with a few hundred markers. Technow et al. (2014) did not find an  
530 improvement of prediction accuracies by using higher SNP density. Additionally, the increase in the  
531 training set size led to a relative small increase in the prediction accuracy. However, the prediction  
532 accuracies obtained by Riedelsheimer et al. (2012) under high density (38,019 SNPs) were  
533 substantially greater than those reached with a low-density marker panel (1,152 SNPs). In the study  
534 of Technow et al. (2012a), the prediction accuracies increased with SNP density and number of  
535 parents tested in hybrid combination.

536 The DH lines sampling process, the heterotic pattern, and the statistical approach should not  
537 be worries for breeders. However, under high heritability notice that sampling more than one DH  
538 line per  $S_0$  or  $S_3$  plant provided the higher coincidence values and high prediction accuracy in our  
539 study. For rice, wheat, and barley breeders our message is: high prediction accuracy and high  
540 efficiency of identification of superior non-assessed single crosses does not depend on heterotic  
541 groups but on the (overall) LD in the group or in each group of DH or inbred lines. In other words,  
542 the efficiency of prediction of non-assessed single crosses derived from DH or inbred lines from the  
543 same population can be as high as the efficiency of prediction of untested single crosses derived  
544 from DH or inbred lines from distinct heterotic groups. This is not confirmed comparing the relative  
545 prediction accuracies for grain yield of maize untested single crosses (from approximately 0.50 to  
546 0.95, for most studies) with those obtained with rice, wheat, and barley untested hybrids (0.50 to  
547 0.60, approximately) (Philipp et al. 2016; Xu et al. 2014; Zhao et al. 2013b). However, the lower  
548 relative prediction accuracies for untested rice, wheat, and barley hybrids should be due to  
549 prediction of two- and three-way crosses. Regarding the statistical approach, our model did not  
550 provide an increase in the efficiency of non-assessed single cross prediction, compared to the  
551 models proposed by Massman et al. (2013) and Technow et al. (2012a). It is important to highlight

552 that our results showed that these two models are really identical (data no shown). Thus, because  
553 the simplified definition of the incidence matrices for these two previous models, it is quite safe to  
554 use any of them. Finally, the choice between the statistical approaches RR-BLUP (prediction of  
555 genotypic values of non-assessed single crosses based on prediction of SNP average effects of  
556 substitution), GBLUP (prediction of genotypic values of non-assessed single crosses based on  
557 additive and dominance genomic matrices), and BLUP (prediction of genotypic values of non-  
558 assessed single crosses based on additive and dominance matrices from pedigree records) is not a  
559 serious worry for breeders too. Our evidence is that there is no significant difference between RR-  
560 BLUP and GBLUP regarding prediction accuracy and efficiency of identification of the best  
561 untested single crosses. Further, even when the level of relatedness between the DH or inbred lines  
562 in each group is low, in general BLUP is as efficient as genomic prediction, excepting when the DH  
563 lines are derived from inbred population. Thus, DNA polymorphism is not essential for an efficient  
564 prediction of non-assessed single cross performance. In his review on genomic selection in hybrid  
565 breeding, Zhao et al. (2015) state that the choice of the biometrical model has no substantial impact  
566 on the prediction accuracy of untested single crosses. Technow et al. (2014) observed that  
567 prediction methods GBLUP and BayesB resulted in very similar prediction accuracies. In the study  
568 of Massman et al. (2013), BLUP and RR-BLUP models did not lead to prediction accuracies that  
569 differed significantly. Comparing GBLUP and BayesB, Technow et al. (2012a) concluded that the  
570 latter method produced significantly higher accuracies for the additive-dominance model.

571 Our main contributions on the prediction efficiency of non-assessed single cross performance  
572 are: 1) the prediction accuracy of untested single crosses ranged from approximately 0.80 to 0.90 as  
573 the heritability of tested single crosses ranged from low (30%) to high (100%); however, the  
574 efficacy of identification of the best 9% of the untested single crosses ranged from approximately  
575 0.50 to 0.70, depending on the DH lines sampling process; 2) the prediction accuracy for crops  
576 showing no defined heterotic pattern can be as efficient as with maize, for which there is well

577 defined heterotic groups; this is because the most important factor affecting the prediction  
578 efficiency is the overall LD; 3) to maximize prediction accuracy and coincidence the choice of  
579 single crosses for testing should be based on a random process; this procedure maximizes the  
580 number of DH lines in hybrid combination and provides better predictions of the SNP average  
581 effects of substitution and dominance deviations; 4) because non significant decreases in the  
582 prediction accuracy and coincidence, the prediction of untested single crosses can be efficient  
583 assuming reduced training set size (10%) and SNP density of 1 cM; 5) RR-BLUP and GBLUP  
584 provides equivalent prediction efficiencies of untested single crosses; 6) excepting for DH lines  
585 derived from inbred populations, BLUP is as efficient as genomic prediction of untested single  
586 crosses; and 7) the theoretical accuracy shows that the prediction accuracy is not affected by the  
587 linkage phase.

#### 588 ACKNOWLEDGMENTS

589 We thank the National Council for Scientific and Technological Development (CNPq), the  
590 Brazilian Federal Agency for Support and Evaluation of Graduate Education (Capes) and the  
591 Foundation for Research Support of Minas Gerais State (Fapemig) for financial support.

#### 592 LITERATURE CITED

593 Albrecht, T., H.-J. Auinger, V. Wimmer, J.O. Ogutu, C. Knaak *et al.*, 2014 Genome-based  
594 prediction of maize hybrid performance across genetic groups, testers, locations, and years.  
595 *Theoretical and Applied Genetics* 127 (6):1375-1386.

596 Albrecht, T., V. Wimmer, H.-J. Auinger, M. Erbe, C. Knaak *et al.*, 2011 Genome-based prediction  
597 of testcross values in maize. *Theoretical and Applied Genetics* 123 (2):339-350.

598 Azevedo, C.F., M.D. Vilela de Resende, F. Fonseca e Silva, J.M. Soriano Viana, M.S. Ferreira  
599 Valente *et al.*, 2015 Ridge, Lasso and Bayesian additive-dominance genomic models. *BMC*  
600 *Genet* 16.

- 601 Barrett, J.C., B. Fry, J. Maller, and M.J. Daly, 2005 Haploview: analysis and visualization of LD  
602 and haplotype maps. *Bioinformatics* 21 (2):263-265.
- 603 Crossa, J., P. Perez, J. Hickey, J. Burgueno, L. Ornella *et al.*, 2014 Genomic prediction in  
604 CIMMYT maize and wheat breeding programs. *Heredity (Edinb)* 112 (1):48-60.
- 605 Daetwyler, H.D., M.P.L. Calus, R. Pong-Wong, G. de los Campos, and J.M. Hickey, 2013 Genomic  
606 Prediction in Animals and Plants: Simulation of Data, Validation, Reporting, and  
607 Benchmarking. *Genetics* 193 (2):347-+.
- 608 de Los Campos, G., J.M. Hickey, R. Pong-Wong, H.D. Daetwyler, and M.P. Calus, 2013 Whole-  
609 genome regression and prediction methods applied to plant and animal breeding. *Genetics*  
610 193 (2):327-345.
- 611 Endelman, J.B., 2011 Ridge Regression and Other Kernels for Genomic Selection with R Package  
612 rrBLUP. *Plant Genome* 4 (3):250-255.
- 613 Jonas, E., and D.J. de Koning, 2013 Does genomic selection have a future in plant breeding? *Trends*  
614 *in Biotechnology* 31 (9):497-504.
- 615 Kadam, D.C., S.M. Potts, M.O. Bohn, A.E. Lipka, and A.J. Lorenz, 2016 Genomic Prediction of  
616 Single Crosses in the Early Stages of a Maize Hybrid Breeding Pipeline. *G3-Genes*  
617 *Genomes Genetics* 6 (11):3443-3453.
- 618 Li, Z., N. Philipp, M. Spiller, G. Stiewe, J.C. Reif *et al.*, 2017 Genome-Wide Prediction of the  
619 Performance of Three-Way Hybrids in Barley. *Plant Genome* 10 (1).
- 620 Massman, J.M., A. Gordillo, R.E. Lorenzana, and R. Bernardo, 2013 Genomewide predictions from  
621 maize single-cross data. *Theor Appl Genet* 126 (1):13-22.
- 622 Meuwissen, T., B. Hayes, and M. Goddard, 2013 Accelerating Improvement of Livestock with  
623 Genomic Selection. *Annual Review of Animal Biosciences, Vol 1* 1:221-237.
- 624 Philipp, N., G.Z. Liu, Y.S. Zhao, S. He, M. Spiller *et al.*, 2016 Genomic Prediction of Barley  
625 Hybrid Performance. *Plant Genome* 9 (2).

- 626 Riedelsheimer, C., A. Czedik-Eysenberg, C. Grieder, J. Lisec, F. Technow *et al.*, 2012 Genomic  
627 and metabolic prediction of complex heterotic traits in hybrid maize. *Nature Genetics* 44  
628 (2):217-220.
- 629 Technow, F., C. Riedelsheimer, T.A. Schrag, and A.E. Melchinger, 2012a Genomic prediction of  
630 hybrid performance in maize with models incorporating dominance and population specific  
631 marker effects. *Theoretical and Applied Genetics* 125 (6):1181-1194.
- 632 Technow, F., C. Riedelsheimer, T.A. Schrag, and A.E. Melchinger, 2012b Genomic prediction of  
633 hybrid performance in maize with models incorporating dominance and population specific  
634 marker effects. *Theor Appl Genet* 125 (6):1181-1194.
- 635 Technow, F., T.A. Schrag, W. Schipprack, E. Bauer, H. Simianer *et al.*, 2014 Genome Properties  
636 and Prospects of Genomic Prediction of Hybrid Performance in a Breeding Program of  
637 Maize. *Genetics* 197 (4):1343-U1469.
- 638 Van Eenennaam, A.L., K.A. Weigel, A.E. Young, M.A. Cleveland, and J.C.M. Dekkers, 2014  
639 Applied Animal Genomics: Results from the Field. *Annual Review of Animal Biosciences*,  
640 *Vol 2* 2:105-139.
- 641 Viana, J.M.S., H.-P. Piepho, and F.F. Silva, 2016 Quantitative genetics theory for genomic  
642 selection and efficiency of breeding value prediction in open-pollinated populations.  
643 *Scientia Agricola* 73 (3):243-251.
- 644 Viana, J.M.S., H.P. Piepho, and F.F. Silva, 2017a Quantitative genetics theory for genomic  
645 selection and efficiency of genotypic value prediction in open-pollinated populations.  
646 *Scientia Agricola* 74 (1):41-50.
- 647 Viana, J.M.S., F.F. Silva, G.B. Mundim, C.F. Azevedo, and H.U. Jan, 2017b Efficiency of low  
648 heritability QTL mapping under high SNP density. *Euphytica* 213 (1).

- 649 Viana, J.M.S., M.S.F. Valente, F.F. Silva, G.B. Mundim, and G.P. Paes, 2013 Efficacy of  
650 population structure analysis with breeding populations and inbred lines. *Genetica* 141 (7-  
651 9):389-399.
- 652 Windhausen, V.S., G.N. Atlin, J.M. Hickey, J. Crossa, J.-L. Jannink *et al.*, 2012 Effectiveness of  
653 Genomic Prediction of Maize Hybrid Performance in Different Breeding Populations and  
654 Environments. *G3-Genes Genomes Genetics* 2 (11):1427-1436.
- 655 Xu, S., D. Zhu, and Q. Zhang, 2014 Predicting hybrid performance in rice using genomic best linear  
656 unbiased prediction. *Proceedings of the National Academy of Sciences of the United States*  
657 *of America* 111 (34):12456-12461.
- 658 Zhao, Y., M. Gowda, W. Liu, T. Wuerschum, H.P. Maurer *et al.*, 2013a Choice of shrinkage  
659 parameter and prediction of genomic breeding values in elite maize breeding populations.  
660 *Plant Breeding* 132 (1):99-106.
- 661 Zhao, Y., M.F. Mette, and J.C. Reif, 2015 Genomic selection in hybrid breeding. *Plant Breeding*  
662 134 (1):1-10.
- 663 Zhao, Y., J. Zeng, R. Fernando, and J.C. Reif, 2013b Genomic Prediction of Hybrid Wheat  
664 Performance. *Crop Science* 53 (3):802.
- 665

666 **Table 1** Average prediction accuracies of non-assessed single crosses and its standard deviation,  
 667 assuming single crosses from selected DH lines, 30 and 10% of assessed single crosses, two traits  
 668 (grain yield - GY, g/plant, and expansion volume - EV, mL/g), two sampling processes of single  
 669 crosses, four statistical models, three DH lines sampling processes, two genetic models, and three  
 670 accuracies of assessed single crosses

| Trait              | Samp. proc. | Statistical model            | DH lines           | Gen. mod.        | Accuracy of assessed single crosses |                 |                 |
|--------------------|-------------|------------------------------|--------------------|------------------|-------------------------------------|-----------------|-----------------|
|                    |             |                              |                    |                  | 0.55                                | 0.77            | 1.00            |
| GY                 | SCs         | Viana et al.                 | 1/S <sub>0</sub>   | AD               | 0.7790 ± 0.0124                     | 0.8447 ± 0.0066 | 0.8859 ± 0.0018 |
|                    |             |                              |                    | A                | 0.7688 ± 0.0132                     | 0.8380 ± 0.0067 | 0.8821 ± 0.0019 |
|                    |             |                              | 1-5/S <sub>0</sub> | AD               | 0.7947 ± 0.0125                     | 0.8525 ± 0.0072 | 0.8896 ± 0.0025 |
|                    |             |                              |                    | A                | 0.7895 ± 0.0126                     | 0.8465 ± 0.0077 | 0.8858 ± 0.0027 |
|                    |             |                              | 1-5/S <sub>3</sub> | AD               | 0.8010 ± 0.0145                     | 0.8678 ± 0.0054 | 0.9276 ± 0.0025 |
|                    |             |                              |                    | A                | 0.7954 ± 0.0145                     | 0.8627 ± 0.0056 | 0.9238 ± 0.0026 |
|                    |             |                              | 1-5/S <sub>3</sub> | AD <sup>a</sup>  | 0.7718 ± 0.0161                     | 0.8371 ± 0.0079 | 0.8888 ± 0.0043 |
|                    |             |                              | 1-5/S <sub>3</sub> | AD <sup>b</sup>  | 0.6836 ± 0.0277                     | 0.7885 ± 0.0139 | 0.8817 ± 0.0049 |
|                    |             |                              | 1/S <sub>0</sub>   | AD <sup>c</sup>  | 0.8293 ± 0.0131                     | 0.8944 ± 0.0049 | 0.9479 ± 0.0017 |
|                    |             |                              | 1-5/S <sub>3</sub> | AD <sup>d</sup>  | 0.8267 ± 0.0082                     | 0.8928 ± 0.0043 | 0.9083 ± 0.0023 |
|                    |             | Massman et. al. <sup>e</sup> | 1/S <sub>0</sub>   | AD               | 0.7874 ± 0.0118                     | 0.8519 ± 0.0053 | 0.8924 ± 0.0026 |
|                    |             |                              | 1-5/S <sub>0</sub> | AD               | 0.7982 ± 0.0140                     | 0.8622 ± 0.0055 | 0.8973 ± 0.0025 |
|                    |             |                              | 1-5/S <sub>3</sub> | AD               | 0.8074 ± 0.0112                     | 0.8753 ± 0.0056 | 0.9314 ± 0.0026 |
|                    |             | GBLUP                        | 1/S <sub>0</sub>   | AD               | 0.7841 ± 0.0122                     | 0.8477 ± 0.0064 | 0.8906 ± 0.0019 |
|                    |             |                              | 1-5/S <sub>0</sub> | AD               | 0.7973 ± 0.0124                     | 0.8574 ± 0.0070 | 0.8978 ± 0.0019 |
|                    |             |                              | 1-5/S <sub>3</sub> | AD               | 0.7911 ± 0.0146                     | 0.8639 ± 0.0056 | 0.9319 ± 0.0023 |
|                    |             | BLUP                         | 1/S <sub>0</sub>   | AD               | 0.7855 ± 0.0129                     | 0.8541 ± 0.0059 | 0.8899 ± 0.0019 |
|                    |             |                              | 1-5/S <sub>0</sub> | AD               | 0.7803 ± 0.0143                     | 0.8435 ± 0.0074 | 0.8830 ± 0.0024 |
|                    |             |                              | 1-5/S <sub>3</sub> | AD               | 0.7227 ± 0.0203                     | 0.7915 ± 0.0077 | 0.8373 ± 0.0048 |
|                    |             | DHs                          | Viana et al.       | 1/S <sub>0</sub> | AD                                  | 0.5012 ± 0.0416 | 0.5117 ± 0.0467 |
| 1-5/S <sub>0</sub> | AD          |                              |                    | 0.4827 ± 0.0423  | 0.5000 ± 0.0420                     | 0.5036 ± 0.0465 |                 |
| 1-5/S <sub>3</sub> | AD          |                              |                    | 0.5799 ± 0.0437  | 0.6106 ± 0.0413                     | 0.6357 ± 0.0429 |                 |
| EV                 | SCs         | Viana et al.                 | 1/S <sub>0</sub>   | AD               | 0.7779 ± 0.0157                     | 0.8458 ± 0.0069 | 0.8820 ± 0.0024 |
|                    |             |                              | 1-5/S <sub>0</sub> | AD               | 0.8019 ± 0.0155                     | 0.8656 ± 0.0050 | 0.9055 ± 0.0020 |
|                    |             |                              | 1-5/S <sub>3</sub> | AD               | 0.7589 ± 0.0143                     | 0.8424 ± 0.0058 | 0.9165 ± 0.0027 |

<sup>a</sup>density of 1 cM; <sup>b</sup>training set of 490 single crosses (10%); <sup>c</sup>after 10 generations of random crosses; <sup>d</sup>single crosses from DH lines of the same population; <sup>e</sup>and Technow et al..

671 **Table 2** Average coincidence of the best 300 predicted single crosses and its standard deviation,  
 672 assuming single crosses from selected DH lines, 30 and 10% of assessed single crosses, two traits  
 673 (grain yield - GY, g/plant, and expansion volume - EV, mL/g), two sampling processes of single  
 674 crosses, four statistical models, three DH lines sampling processes, two genetic models, and three  
 675 parametric coincidence of assessed single crosses

| Trait              | Samp. proc. | Statistical model            | DH lines           | Gen. mod.        | Coincidence of assessed single crosses |                 |                 |
|--------------------|-------------|------------------------------|--------------------|------------------|----------------------------------------|-----------------|-----------------|
|                    |             |                              |                    |                  | 0.26                                   | 0.48            | 1.00            |
| GY                 | SCs         | Viana et al.                 | 1/S <sub>0</sub>   | AD               | 0.4523 ± 0.0334                        | 0.5525 ± 0.0190 | 0.6037 ± 0.0170 |
|                    |             |                              |                    | A                | 0.4396 ± 0.0346                        | 0.5449 ± 0.0176 | 0.5976 ± 0.0172 |
|                    |             |                              | 1-5/S <sub>0</sub> | AD               | 0.5686 ± 0.0273                        | 0.6369 ± 0.0221 | 0.6842 ± 0.0140 |
|                    |             |                              |                    | A                | 0.5640 ± 0.0283                        | 0.6299 ± 0.0221 | 0.6816 ± 0.0152 |
|                    |             |                              | 1-5/S <sub>3</sub> | AD               | 0.5129 ± 0.0235                        | 0.6044 ± 0.0200 | 0.7363 ± 0.0183 |
|                    |             |                              |                    | A                | 0.5063 ± 0.0225                        | 0.5993 ± 0.0193 | 0.7305 ± 0.0190 |
|                    |             |                              | 1-5/S <sub>3</sub> | AD <sup>a</sup>  | 0.4881 ± 0.0278                        | 0.5691 ± 0.0229 | 0.6620 ± 0.0215 |
|                    |             |                              | 1-5/S <sub>3</sub> | AD <sup>b</sup>  | 0.3805 ± 0.0511                        | 0.4797 ± 0.0354 | 0.6087 ± 0.0233 |
|                    |             |                              | 1/S <sub>0</sub>   | AD <sup>c</sup>  | 0.5528 ± 0.0298                        | 0.6489 ± 0.0203 | 0.7571 ± 0.0162 |
|                    |             |                              | 1-5/S <sub>3</sub> | AD <sup>d</sup>  | 0.6116 ± 0.0214                        | 0.7156 ± 0.0150 | 0.7581 ± 0.0166 |
|                    |             | Massman et. al. <sup>e</sup> | 1/S <sub>0</sub>   | AD               | 0.4670 ± 0.0346                        | 0.5663 ± 0.0174 | 0.6157 ± 0.0157 |
|                    |             |                              | 1-5/S <sub>0</sub> | AD               | 0.5651 ± 0.0310                        | 0.6431 ± 0.0164 | 0.6955 ± 0.0144 |
|                    |             |                              | 1-5/S <sub>3</sub> | AD               | 0.5279 ± 0.0291                        | 0.6139 ± 0.0204 | 0.7423 ± 0.0172 |
|                    |             | GBLUP                        | 1/S <sub>0</sub>   | AD               | 0.4622 ± 0.0308                        | 0.5660 ± 0.0190 | 0.6092 ± 0.0163 |
|                    |             |                              | 1-5/S <sub>0</sub> | AD               | 0.5650 ± 0.0280                        | 0.6384 ± 0.0204 | 0.6849 ± 0.0137 |
|                    |             |                              | 1-5/S <sub>3</sub> | AD               | 0.5010 ± 0.0245                        | 0.5937 ± 0.0216 | 0.7294 ± 0.0168 |
|                    |             | BLUP                         | 1/S <sub>0</sub>   | AD               | 0.4641 ± 0.0331                        | 0.5709 ± 0.0176 | 0.6081 ± 0.0127 |
|                    |             |                              | 1-5/S <sub>0</sub> | AD               | 0.5531 ± 0.0323                        | 0.6272 ± 0.0194 | 0.6699 ± 0.0130 |
|                    |             |                              | 1-5/S <sub>3</sub> | AD               | 0.4172 ± 0.0258                        | 0.4731 ± 0.0211 | 0.5377 ± 0.0196 |
|                    |             | DHs                          | Viana et al.       | 1/S <sub>0</sub> | AD                                     | 0.2753 ± 0.0374 | 0.3056 ± 0.0445 |
| 1-5/S <sub>0</sub> | AD          |                              |                    | 0.3268 ± 0.0642  | 0.3400 ± 0.0691                        | 0.3461 ± 0.0728 |                 |
| 1-5/S <sub>3</sub> | AD          |                              |                    | 0.3699 ± 0.0583  | 0.3931 ± 0.0579                        | 0.4300 ± 0.0633 |                 |
| EV                 | SCs         | Viana et al.                 | 1/S <sub>0</sub>   | AD               | 0.5156 ± 0.0331                        | 0.6081 ± 0.0159 | 0.6599 ± 0.0146 |
|                    |             |                              | 1-5/S <sub>0</sub> | AD               | 0.5506 ± 0.0285                        | 0.6337 ± 0.0203 | 0.6944 ± 0.0141 |
|                    |             |                              | 1-5/S <sub>3</sub> | AD               | 0.4746 ± 0.0294                        | 0.5843 ± 0.0174 | 0.7141 ± 0.0171 |

<sup>a</sup>density of 1 cM; <sup>b</sup>training set of 490 single crosses (10%); <sup>c</sup>after 10 generations of random crosses; <sup>d</sup>single crosses from DH lines of the same population; <sup>e</sup>and Technow et al..



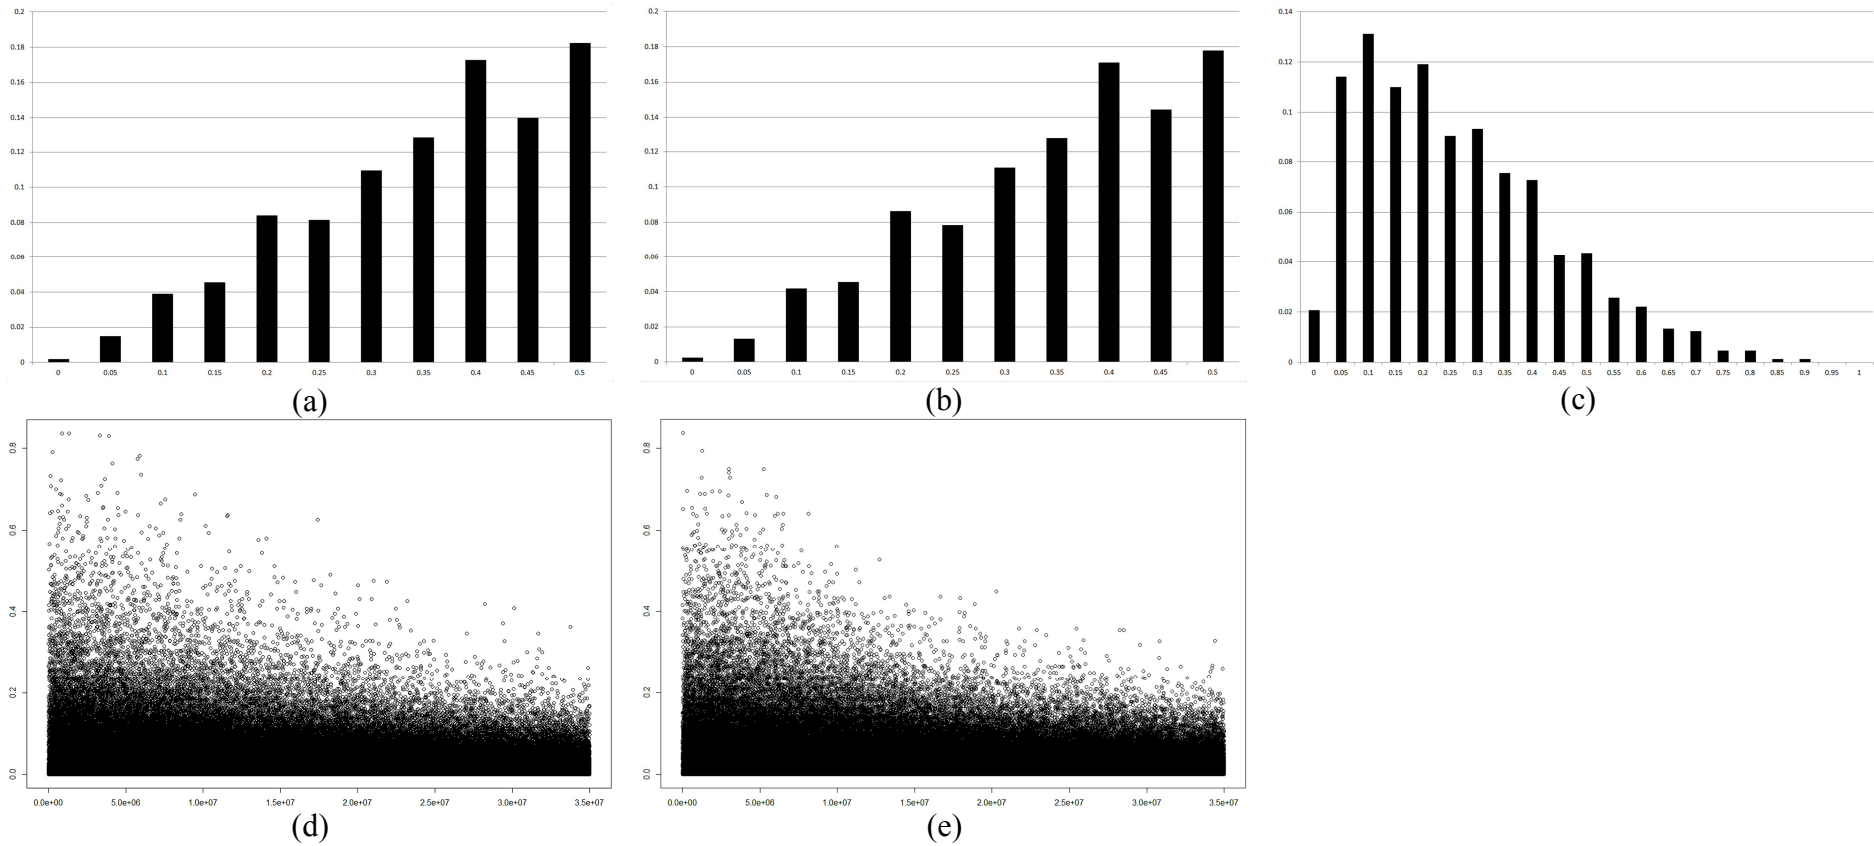

676 **Figure 1** Frequency distribution of the MAF in the groups of selected DH lines (a and b) and the absolute value of the difference between a SNP allele  
 677 frequency (c), and LD ( $r^2$ ) in relation to distance (cM) in the two groups of selected DH lines (d and e), regarding SNPs in chromosome 1 separated by  
 678 zero to 35 cM, assuming one DH line per  $S_0$  plant.

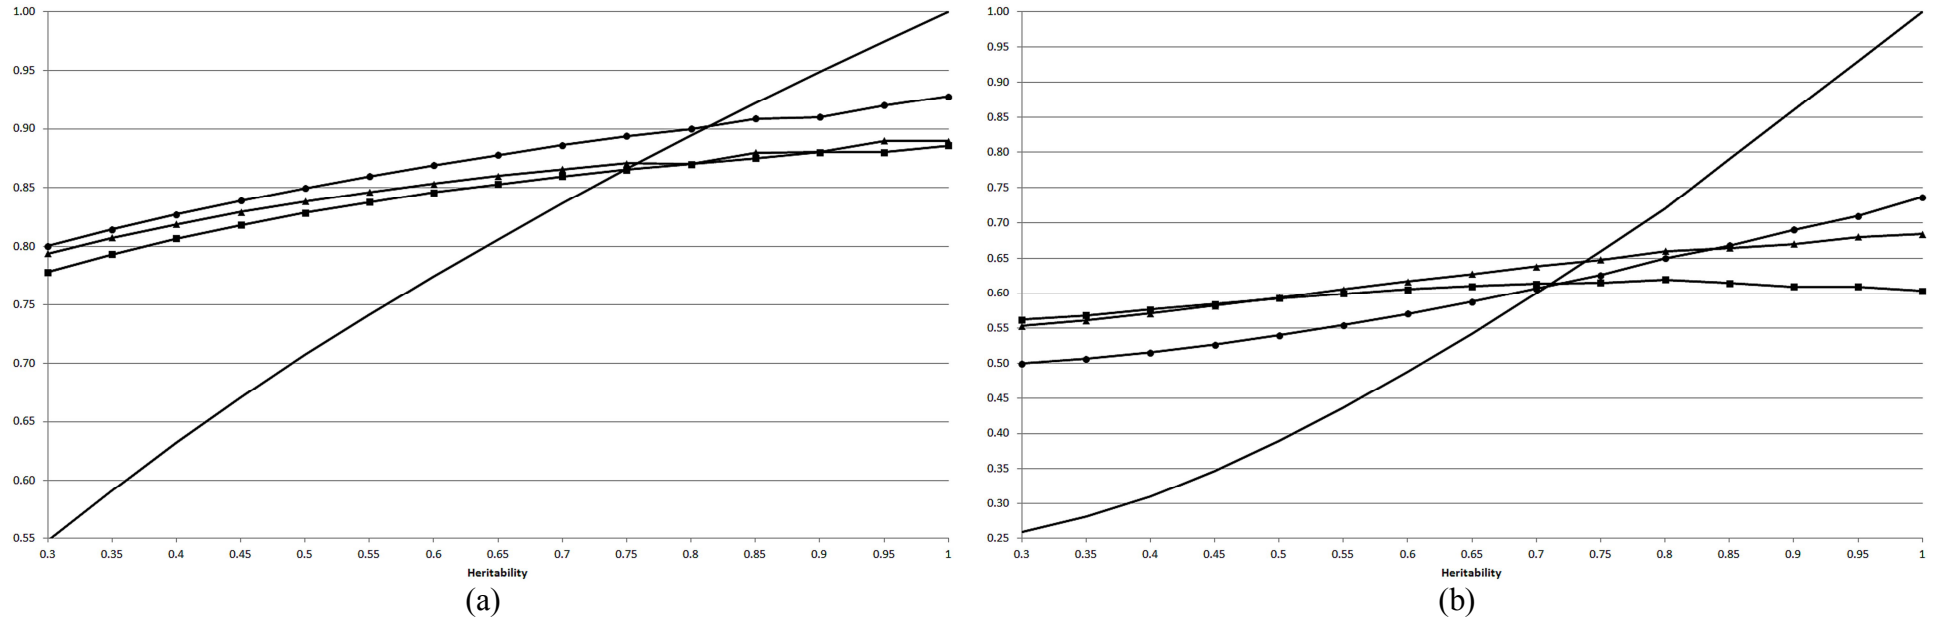

679 **Figure 2** Predicted accuracies (a) and coincidence indexes (b) for untested single crosses (square:  $1/S_0$ ; triangle:  $1-5/S_0$ ; circle:  $1-5/S_3$ ), and parametric  
 680 accuracies and coincidence indexes for tested single crosses (continuous line), assuming our model, average SNP density of 0.1 cM, training set size of  
 681 30%, positive dominance (grain yield), additive-dominance model, and sampling of single crosses.
